# Supplementary material
Source: PubMed Central journal article supplement (PMC3818991)
Supplement: mbt0004-0323-SD3.pdf [file mbt0004-0323-SD3.pdf]

## **Supplementary Information : COG distribution of the twenty *Lactobacillus* genomes.**

|                                                                            | Lacto<br>bacill<br>us |
|----------------------------------------------------------------------------|-----------------------|-----------------------|-----------------------|-----------------------|-----------------------|-----------------------|-----------------------|-----------------------|-----------------------|-----------------------|-----------------------|-----------------------|-----------------------|-----------------------|-----------------------|-----------------------|-----------------------|-----------------------|-----------------------|-----------------------|
| COG<br>Categories                                                          | NCFM                  | 4571                  | 3                     | ST1                   | 5                     | 533                   | 365                   | 2                     | 334                   | BL23                  | GG                    | 705                   | 23k                   | 367                   | JDM1                  | 1                     | 3956                  | 6                     | 1112                  | rius                  |
| Amino acid<br>transport<br>and<br>metabolism                               | 8.39                  | 7.51                  | 6.39                  | 7.56                  | 7.48                  | 7.05                  | 8.21                  | 8.05                  | 8.23                  | 8.21                  | 8.36                  | 7.99                  | 6.4                   | 7.31                  | 8.47                  | 8.52                  | 9.99                  | 8.17                  | 8.22                  | 7.93                  |
| Carbohydra<br>te transport<br>and<br>metabolism                            | 10.87                 | 7.24                  | 10.29                 | 10.27                 | 10.33                 | 10.97                 | 5.44                  | 5.26                  | 10.54                 | 13.68                 | 13.16                 | 13.95                 | 7.47                  | 8.35                  | 11.67                 | 11.38                 | 6.18                  | 6.29                  | 6.55                  | 8.49                  |
| Cell cycle<br>control, cell<br>division,<br>chromosom<br>e<br>partitioning | 1.43                  | 1.21                  | 1.56                  | 1.32                  | 1.57                  | 1.46                  | 1.46                  | 1.43                  | 1.27                  | 1.11                  | 1.28                  | 1.37                  | 1.52                  | 1.26                  | 1.02                  | 1.07                  | 1.15                  | 1.21                  | 1.05                  | 1.86                  |
| Cell motility<br>Cell<br>wall/memb<br>rane/envel<br>ope<br>biogenesis      | 0.33                  | 0.4                   | 0.35                  | 0.37                  | 0.36                  | 0.33                  | 0.38                  | 0.32                  | 0.19                  | 0.17                  | 0.23                  | 0.18                  | 0.44                  | 0.33                  | 0.29                  | 0.24                  | 0.55                  | 0.48                  | 0.49                  | 0.43                  |
| Coenzyme<br>transport<br>and<br>metabolism                                 | 5.99                  | 4.96                  | 6.17                  | 5.10                  | 5.49                  | 6.25                  | 6.29                  | 6.22                  | 4.7                   | 4.83                  | 5.3                   | 5.47                  | 5.64                  | 5.57                  | 5.44                  | 5.79                  | 4.97                  | 5.08                  | 5.13                  | 6.57                  |
| Defense<br>mechanism<br>s                                                  | 1.89                  | 2.48                  | 2.06                  | 2.52                  | 2.35                  | 2.13                  | 2.22                  | 2.31                  | 2.59                  | 2.44                  | 2.51                  | 2.6                   | 3.36                  | 2.95                  | 3.85                  | 3.69                  | 4.6                   | 4.96                  | 5.56                  | 2.48                  |
| Energy<br>production<br>and<br>conversion                                  | 2.47                  | 2.88                  | 2.91                  | 3.02                  | 2.57                  | 2.73                  | 2.68                  | 3.03                  | 3.1                   | 3.16                  | 3.29                  | 4.1                   | 2.15                  | 1.53                  | 2.17                  | 2.02                  | 1.15                  | 1.81                  | 1.67                  | 1.92                  |
| Function<br>unknown                                                        | 4.1                   | 3.22                  | 3.62                  | 3.90                  | 3.56                  | 3.52                  | 2.91                  | 3.03                  | 4.52                  | 4.28                  | 4.02                  | 4.19                  | 3.93                  | 4.04                  | 4.34                  | 4.32                  | 3.76                  | 4.23                  | 4.45                  | 4.03                  |
| General<br>function<br>prediction<br>only                                  | 9.04                  | 8.58                  | 10.29                 | 9.32                  | 9.69                  | 9.51                  | 9.13                  | 8.84                  | 9.31                  | 9.45                  | 9.23                  | 8.83                  | 11.02                 | 9.93                  | 8.84                  | 8.64                  | 8                     | 8.95                  | 8.71                  | 9.98                  |
| Inorganic<br>ion<br>transport<br>and<br>metabolism                         | 11.84                 | 10.93                 | 11.92                 | 11.84                 | 11.83                 | 11.57                 | 11.35                 | 11.16                 | 12.09                 | 12.27                 | 12.06                 | 11.78                 | 12.29                 | 12.34                 | 13.06                 | 13.04                 | 11.75                 | 11.98                 | 12.05                 | 11.09                 |
| Intracellula<br>r<br>trafficking,<br>secretion,<br>and                     | 4.23                  | 4.43                  | 4.26                  | 4.28                  | 4.49                  | 4.32                  | 4.45                  | 4.46                  | 4.23                  | 4.4                   | 4.48                  | 4.46                  | 4.37                  | 4.69                  | 4.87                  | 4.76                  | 4.24                  | 3.57                  | 3.83                  | 3.59                  |
|                                                                            | 1.24                  | 1.41                  | 1.49                  | 1.19                  | 1.43                  | 1.46                  | 1.46                  | 1.43                  | 0.99                  | 0.94                  | 0.82                  | 0.88                  | 1.33                  | 1.2                   | 0.98                  | 0.95                  | 1.33                  | 1.39                  | 1.3                   | 1.49                  |

|                                                              |       |       |       |       |       |       |       |       |       |      |       |       |       |      |       |       |       |       |       |       |
|--------------------------------------------------------------|-------|-------|-------|-------|-------|-------|-------|-------|-------|------|-------|-------|-------|------|-------|-------|-------|-------|-------|-------|
| vesicular transport                                          |       |       |       |       |       |       |       |       |       |      |       |       |       |      |       |       |       |       |       |       |
| Lipid transport and metabolism                               | 2.21  | 2.88  | 1.99  | 2.45  | 2.07  | 2.13  | 2.91  | 3.03  | 2.54  | 2.31 | 2.33  | 2.38  | 2.85  | 3.17 | 2.54  | 2.62  | 3.03  | 2.66  | 2.66  | 2.79  |
| Nucleotide transport and metabolism                          | 5.01  | 5.57  | 4.33  | 4.22  | 4.49  | 4.19  | 5.75  | 6.06  | 3.81  | 3.59 | 3.7   | 3.84  | 5.07  | 3.88 | 3.68  | 3.69  | 5.09  | 5.02  | 5.07  | 4.4   |
| Posttranslational modification, protein turnover, chaperones | 2.8   | 2.95  | 2.98  | 2.70  | 3.06  | 3.19  | 3.3   | 3.27  | 2.54  | 2.57 | 2.51  | 2.43  | 3.04  | 2.62 | 2.46  | 2.22  | 2.85  | 2.84  | 2.9   | 3.1   |
| Replication, recombination and repair                        | 7.42  | 14.62 | 7.74  | 9.95  | 8.7   | 7.78  | 8.51  | 9.16  | 9.5   | 7.27 | 7.13  | 5.74  | 6.84  | 7.26 | 4.99  | 5.59  | 12.72 | 11.31 | 10.2  | 8.8   |
| Secondary metabolites biosynthesis, transport and catabolism | 0.52  | 0.87  | 0.35  | 0.44  | 0.57  | 0.47  | 0.54  | 0.48  | 1.08  | 1.11 | 0.96  | 0.93  | 1.08  | 1.91 | 1.11  | 1.27  | 1.03  | 1.39  | 1.42  | 1.05  |
| Signal transduction mechanisms                               | 3.64  | 2.75  | 3.19  | 2.89  | 2.78  | 3.72  | 5.06  | 4.38  | 3.62  | 3.63 | 3.38  | 3.62  | 3.29  | 3.77 | 3.89  | 3.96  | 2.85  | 3.39  | 3.46  | 3.66  |
| Transcription                                                | 7.74  | 5.97  | 8.23  | 7.68  | 7.13  | 7.78  | 7.36  | 7.09  | 8.14  | 8.29 | 8.45  | 8.65  | 8.68  | 9.66 | 10.11 | 10.15 | 6.42  | 6.9   | 6.74  | 7.56  |
| Translation, ribosomal structure and biogenesis              | 8.85  | 9.12  | 9.87  | 8.88  | 10.05 | 9.44  | 10.58 | 11    | 7.01  | 6.28 | 6.81  | 6.62  | 9.25  | 8.24 | 6.22  | 6.1   | 8.36  | 8.35  | 8.53  | 8.8   |
| Not in COGs                                                  | 27.26 | 23.72 | 29.78 | 33.08 | 26.79 | 27.72 | 35.87 | 48.39 | 31.62 | 31   | 30.98 | 29.85 | 26.35 | 27.8 | 25.71 | 28.64 | 20.68 | 25.7  | 21.36 | 32.79 |
